# Supplementary material
Source: MDPI journal article supplement (https://www.mdpi.com/2076-2615/3/4/1142)
Supplement: s1 [file s1]

(listing pending)
